# Supplementary material for: On-farm performance of genetically-improved rohu (Labeo rohita) in Bangladesh
Source: Frontiers journal article supplement (doi:10.3389/faquc.2022.1060335), 2022-12-16
Supplement: Data_Sheet_3.PDF [file Data_Sheet_3.PDF]

### Supplementary Material 3

#### Water quality parameters

**Supplementary Table 3.1.** Water quality parameter means for in ponds in the Jashore region. Standard deviations are in parentheses.

| Farm | pH        |           | Dissolved oxygen (mg/l) |           | Total ammonia nitrogen (mg/l) | Alkalinity (mg/l; CaCO <sub>3</sub> equivalent) | Water transparency (measured by Secchi disc in cm) | Water colour                                                        |
|------|-----------|-----------|-------------------------|-----------|-------------------------------|-------------------------------------------------|----------------------------------------------------|---------------------------------------------------------------------|
|      | Morning   | Afternoon | Morning                 | Afternoon |                               |                                                 |                                                    |                                                                     |
| A    | 8.0 (0.5) | 8.3 (0.4) | 4.4 (0.8)               | 6.8 (0.6) | 0.17 (0.12)                   | 230.9 (22.1)                                    | 24.8 (1.3)                                         | Mostly green                                                        |
| B    | 8.1 (0.6) | 8.4 (0.6) | 4.9 (1.0)               | 7.1 (0.5) | 0.17 (0.12)                   | 295.0 (25.6)                                    | 23.4 (0.9)                                         | Mostly green                                                        |
| C    | 8.1 (0.4) | 8.2 (0.5) | 4.1 (0.6)               | 6.5 (0.4) | 0.15 (0.16)                   | 200.9 (21.5)                                    | 27.7 (1.7)                                         | Fluctuated between brown and green colours                          |
| D    | 8.0 (0.4) | 8.3 (0.5) | 3.8 (1.0)               | 6.0 (0.7) | 0.35 (0.13)                   | 205.2 (24.2)                                    | 27.3 (2.4)                                         | Mostly green with the appearance of brown colour occasionally       |
| E    | 7.9 (0.5) | 8.3 (0.5) | 4.4 (1.2)               | 5.9 (0.6) | 0.25 (0.20)                   | 171.0 (24.2)                                    | 25.4 (3.0)                                         | Fluctuated among green, turbid and brown colours                    |
| F    | 8.0 (0.4) | 8.3 (0.4) | 4.7 (1.2)               | 6.1 (0.6) | 0.10 (0.13)                   | 153.9 (24.2)                                    | 26.5 (2.8)                                         | Mostly brown with the appearance of turbid colour occasionally      |
| G    | 7.9 (0.4) | 8.3 (0.4) | 3.7 (1.0)               | 5.8 (0.5) | 0.12 (0.13)                   | 175.3 (16.4)                                    | 26.1 (1.7)                                         | Fluctuated between green and brown colours                          |
| H    | 8.1 (0.5) | 8.3 (0.4) | 4.8 (1.3)               | 6.9 (0.4) | 0.19 (0.11)                   | 235.1 (25.7)                                    | 23.5 (0.8)                                         | Mostly green                                                        |
| I    | 8.0 (0.4) | 8.3 (0.4) | 4.1 (0.7)               | 6.2 (0.5) | 0.10 (0.13)                   | 153.9 (14.0)                                    | 28.8 (2.6)                                         | Mostly brown with occasional appearance of green colour             |
| J    | 8.1 (0.5) | 8.2 (0.4) | 4.3 (0.8)               | 6.3 (0.5) | 0.38 (0.50)                   | 192.4 (16.4)                                    | 27.1 (3.4)                                         | Mostly brown with occasional appearance of turbid and green colours |

**Supplementary Table 3.2.** Water quality parameters means for ponds in the Natore-Rajshahi region. Standard deviations are in parentheses.

| Farm | pH        |           | Dissolved oxygen (mg/l) |           | Total ammonia nitrogen (mg/l) | Alkalinity (mg/l; CaCO <sub>3</sub> equivalent) | Water transparency (measured by Secchi disc in cm) | Water colour                                             |
|------|-----------|-----------|-------------------------|-----------|-------------------------------|-------------------------------------------------|----------------------------------------------------|----------------------------------------------------------|
|      | Morning   | Afternoon | Morning                 | Afternoon |                               |                                                 |                                                    |                                                          |
| K    | 7.4 (0.1) | 7.6 (0.1) | 4.1 (0.7)               | 7.0 (1.4) | 0.30 (0.11)                   | 172.5 (24.7)                                    | 20.8 (5.5)                                         | Mostly green                                             |
| L    | 7.4 (0.2) | 7.6 (0.1) | 3.0 (0.5)               | 5.8 (1.3) | 0.34 (0.23)                   | 190.0 (28.3)                                    | 30.6 (11.6)                                        | Mostly green                                             |
| M    | 7.5 (0.2) | 7.6 (0.2) | 3.2 (0.4)               | 5.9 (1.4) | 0.27 (0.15)                   | 235.0 (49.5)                                    | 21.6 (6.0)                                         | Fluctuated between green and brown colours               |
| N    | 7.4 (0.1) | 7.5 (0.2) | 3.0 (0.3)               | 4.5 (0.9) | 0.63 (0.41)                   | No data                                         | 39.1 (7.5)                                         | Fluctuated between green and clear water colours         |
| O    | 7.5 (0.1) | 7.7 (0.1) | 3.2 (0.4)               | 5.6 (1.3) | 0.21 (0.17)                   | 210.0 (14.1)                                    | 27.4 (7.4)                                         | Fluctuated among green, clear, and turbid water colours  |
| P    | 7.4 (0.2) | 7.6 (0.1) | 2.8 (0.5)               | 4.8 (1.3) | 0.48 (0.26)                   | 260.0 (0.0)                                     | 31.5 (11.4)                                        | Mostly green with the appearance of turbid colour lately |
| Q    | 7.5 (0.1) | 7.5 (0.1) | 3.5 (0.9)               | 5.1 (1.1) | 0.27 (0.07)                   | 175.0 (0.0)                                     | 19.9 (5.0)                                         | Mostly turbid                                            |
| R    | 7.5 (0.1) | 7.7 (0.1) | 3.3 (0.7)               | 5.5 (1.8) | 0.33 (0.28)                   | 178.0 (31.1)                                    | 26.9 (5.1)                                         | Fluctuated between green and turbid colours              |
| S    | 7.5 (0.1) | 7.6 (0.1) | 3.6 (0.6)               | 6.5 (1.5) | 0.30 (0.11)                   | 195.0 (21.2)                                    | 30.5 (10.6)                                        | Fluctuated among green, clear, and brown colours         |

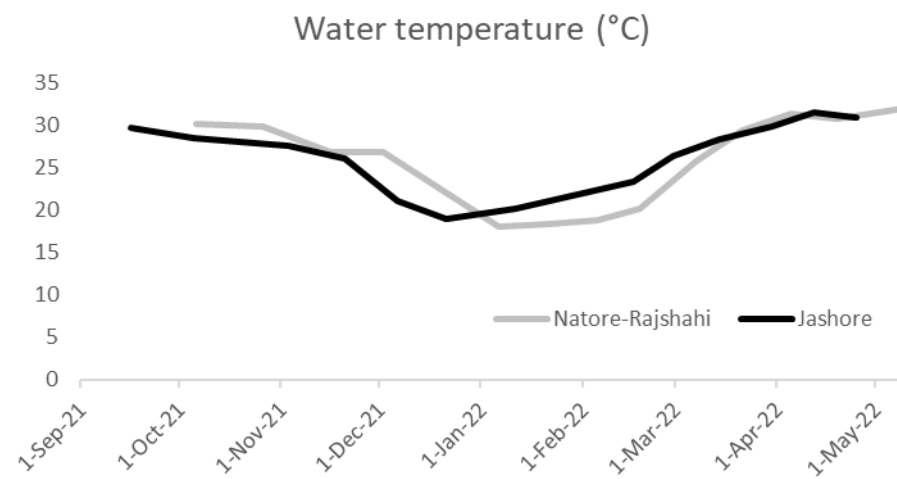

**Supplementary Figure 3.1.** Mean water temperature (°C) in ponds by region.
